# Supplementary material
Source: PubMed Central journal article supplement (PMC4079733)

## Supplemental Figure Legend

### Figure S1. Potential roles of transcription factors in PUMA induction by regorafenib in

**CRC cells.** (A) HCT116 cells were transfected with a control scrambled siRNA or siRNA against indicated genes. Expression of indicated genes at 24 hours after siRNA transfection was analyzed by RT-PCR. (B) Following siRNA transfection as in (A), HCT116 cells were treated with 40  $\mu\text{mol/L}$  regorafenib for 24 hours. PUMA expression was analyzed by Western blotting. (C) The levels of p73, p-STAT1 (Y701), STAT1, p-FoxO3a (T32), and FoxO3a were analyzed by Western blotting at indicated time points in HCT116 cells treated with 40  $\mu\text{mol/L}$  regorafenib. (D) HCT116 cells were transfected with the control or *FoxO3a* siRNA, and then treated with 40  $\mu\text{mol/L}$  regorafenib for 24 hours. The levels of FoxO3a and PUMA were analyzed by Western blotting.

### Figure S2. p65 mediates PUMA induction by regorafenib in CRC cells.

(A) HCT116 cells were treated with regorafenib at indicated concentrations for 24 hours. The levels of p-p65 (S536) and  $\beta$ -actin were analyzed by Western blotting. (B) HCT116 cells were treated with 40  $\mu\text{mol/L}$  regorafenib for the indicated times. The levels of p-p65 (S276, S468) were analyzed by Western blotting. (C) DLD1 cells were transfected with control or *p65* siRNA, and then treated with 40  $\mu\text{mol/L}$  regorafenib for 24 hours. p65 and PUMA expression was analyzed by Western blotting. (D) WT and *p65*-KO MEFs were treated with 40  $\mu\text{mol/L}$  regorafenib for 24 hours. PUMA expression was analyzed by Western blotting. (E) *Left*, schematic representation of the genomic structure of *PUMA* highlighting the *PUMA* promoter Fragments (Frag) A-E used in the luciferase experiment. *Right*, *p53*-KO HCT116 cells were transfected overnight with the indicated *PUMA* promoter luciferase reporters, and then treated with 40  $\mu\text{mol/L}$  regorafenib for 16 hours. Reporter activities were normalized to the untreated control samples and plotted. (F) Schematic representation of the 5 putative  $\kappa\text{B}$  sites in Fragment A of the *PUMA* promoter.

Asterisks denote mutated nucleotides. **(G)** HCT116 cells were treated as **(B)**. The levels of p-I $\kappa$ B (S22/23) and I $\kappa$ B were analyzed by Western blotting at indicated time points.

**Figure S3. PUMA-dependent chemosensitization by regorafenib in CRC cells.** **(A)** WT HCT116 cells were treated with 20  $\mu$ mol/L regorafenib, 25  $\mu$ mol/L cisplatin, or their combination for 24 hours. PUMA expression was analyzed by Western blotting. **(B)** WT and *PUMA*-KO HCT116 cells were treated as **(A)** for 48 hours. Apoptosis was determined by nuclear staining with Hoechst 33258. **(C)** WT and *PUMA*-KO HCT116 cells were treated for 48 hours with 20  $\mu$ mol/L regorafenib, alone or in combination with 5  $\mu$ mol/L gefitinib. Apoptosis was determined as in **(B)**. **(D)** WT and *PUMA*-KO HCT116 cells were treated for 48 hours with 20  $\mu$ mol/L regorafenib, alone or in combination with 1  $\mu$ mol/L UCN-01. Apoptosis was determined as in **(B)**. Results in **(B)**-**(D)** were expressed as means  $\pm$  SD of 3 independent experiments. \*\*\*,  $P < 0.001$ ; \*\*,  $P < 0.01$ ; \*,  $P < 0.05$ .

**Figure S4. PUMA-dependent chemosensitization by regorafenib in xenograft tumors.** **(A)** Mice with WT or *PUMA*-KO HCT116 xenograft tumors were treated with 15 mg/kg regorafenib daily by oral gavage, 25 mg/kg 5-FU every other day by i.p. injection, or their combination for 10 consecutive days. Representative tumors at the end of the experiment are shown. **(B)** Mice with WT or *PUMA*-KO HCT116 xenograft tumors were treated with 15 mg/kg regorafenib daily, 25 mg/kg 5-FU every other day, or their combination as in **(A)** for 4 consecutive days. Paraffin-embedded sections were analyzed by TUNEL staining. TUNEL-positive cells were counted and plotted. Representative TUNEL staining pictures are shown. **(C)** Tissue sections from **(B)** were analyzed by active caspase 3 staining. Representative staining pictures are shown. Arrows, example cells with positive staining; scale bars, 25  $\mu$ m.

Figure S1

**A**

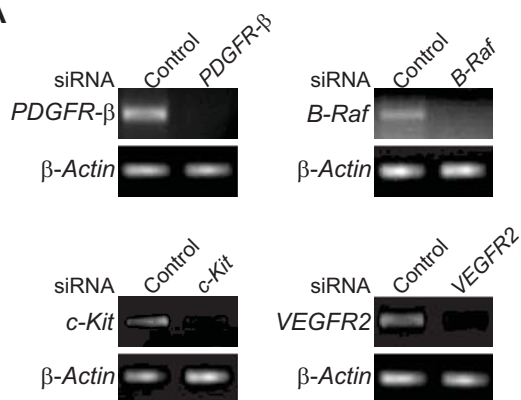

**B**

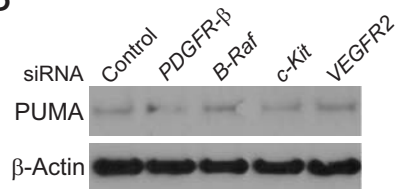

**C**

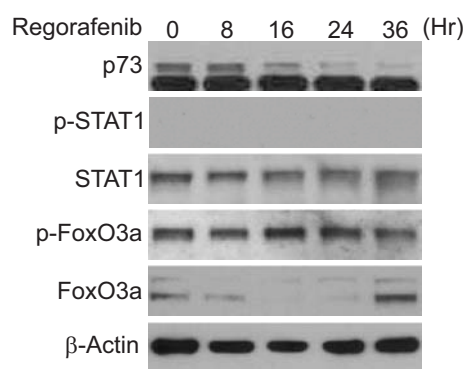

**D**

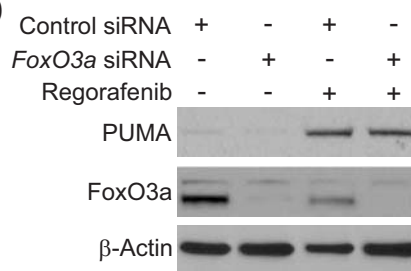

Figure S2

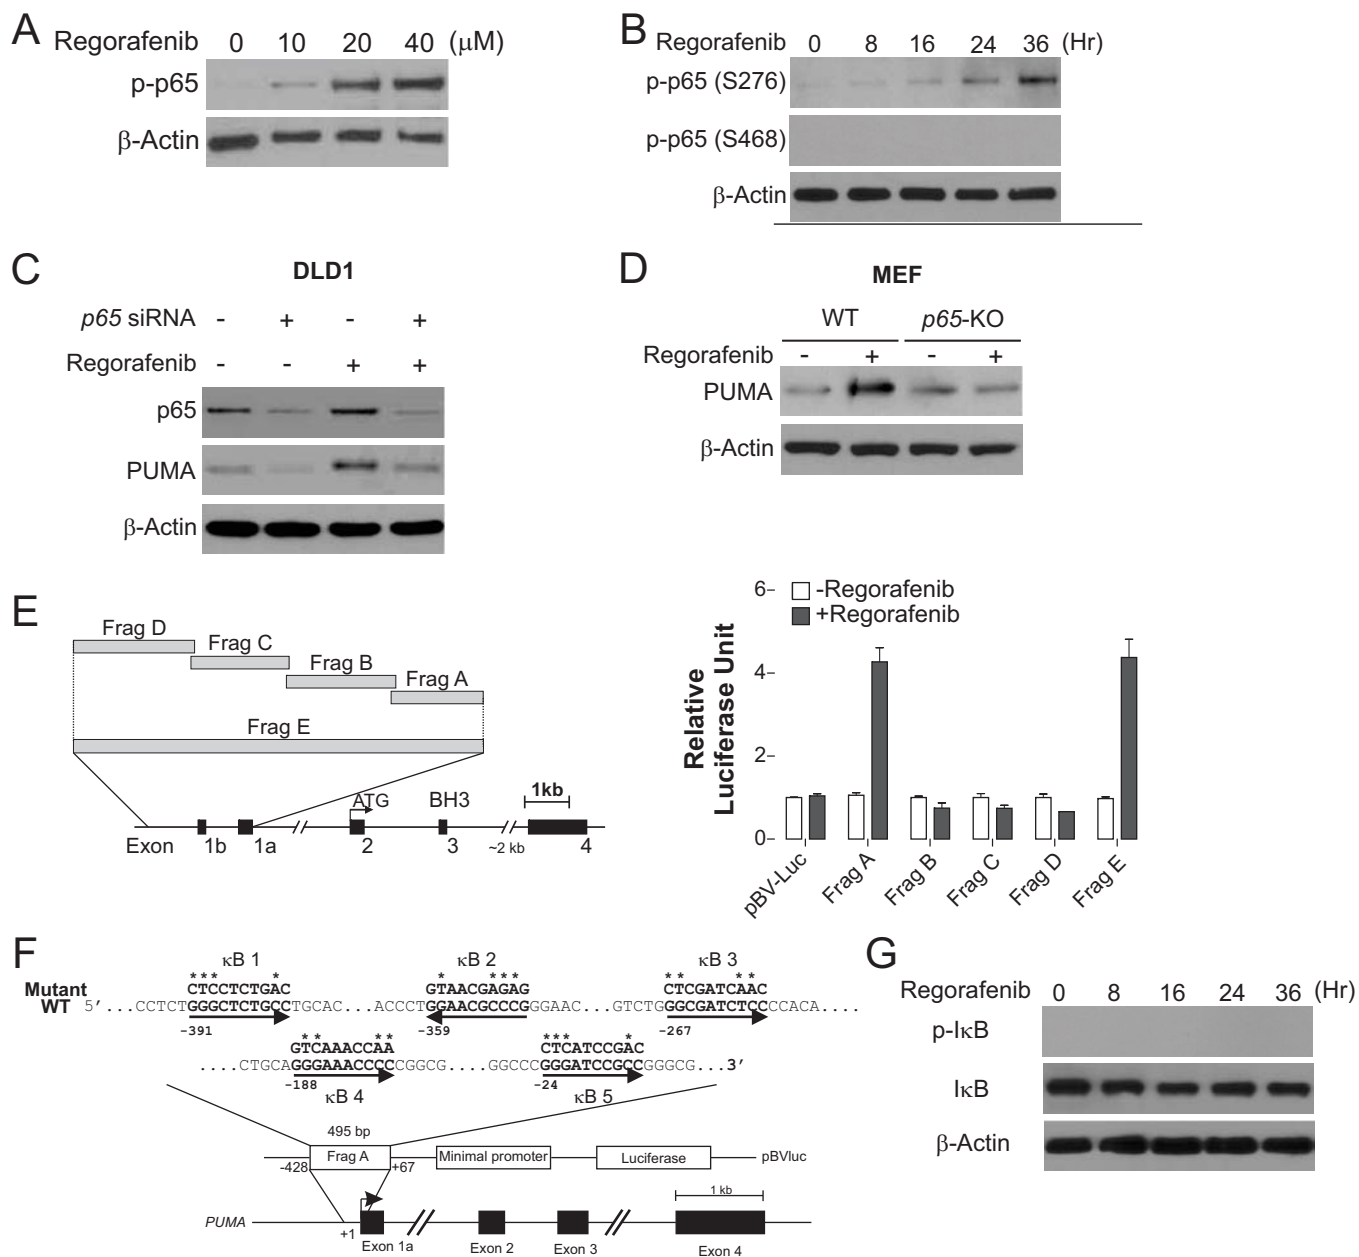

Figure S3

A

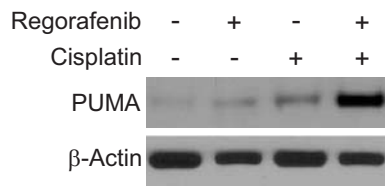

B

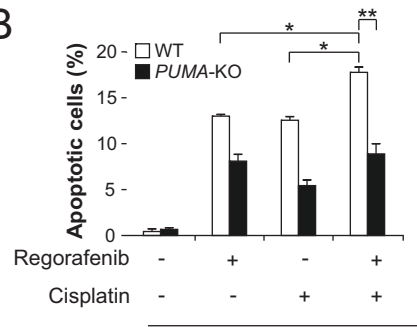

C

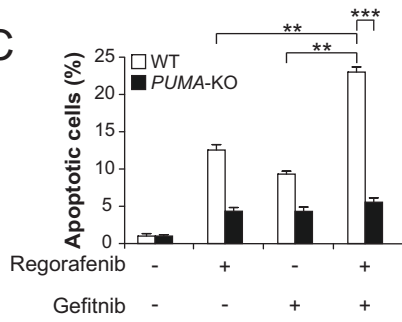

D

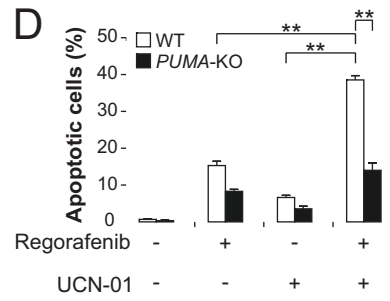

Figure S4

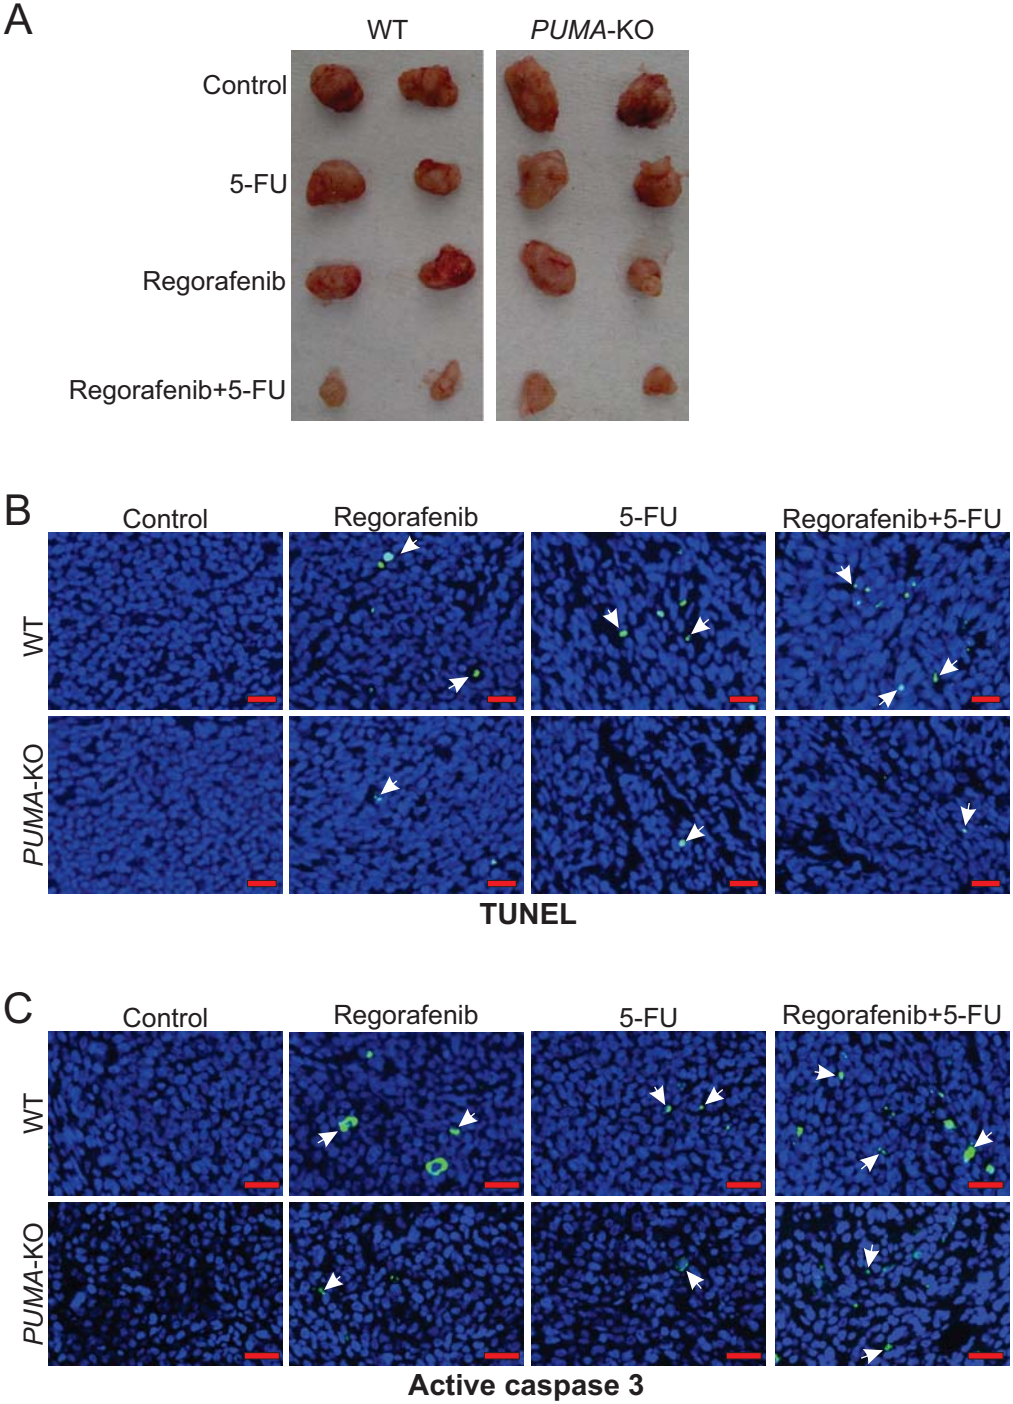

Supplement: NIHMS588757-supplement-1.pdf [file NIHMS588757-supplement-1.pdf]
